# Supplementary material for: Fish Sidestream-Derived Protein Hydrolysates Suppress DSS-Induced Colitis by Modulating Intestinal Inflammation in Mice
Source: MDPI journal article supplement (doi:10.3390/md19060312), 2021-05-28
Supplement: s1 [file s1]

Supplementary Material for

# Fish sidestream-derived protein hydrolysates suppress DSS-induced colitis by modulating intestinal inflammation in mice

Maria G. Daskalaki <sup>1,2</sup>, Konstantinos Axarlis <sup>1,2</sup>, Tone Aspevik <sup>3</sup>, Michail Orfanakis <sup>1,2</sup>, Ourania Kolliniati <sup>1,2</sup>, Ioanna Lapi <sup>1,2</sup>, Maria Tzardi <sup>4</sup>, Eirini Dermitzaki <sup>1</sup>, Maria Venihaki <sup>1</sup>, Katerina Kousoulaki <sup>3</sup> and Christos Tsatsanis <sup>1,2,\*</sup>

<sup>1</sup> Laboratory of Clinical Chemistry, Medical School, University of Crete, Heraklion 70013, Greece; m.daskalaki@med.uoc.gr (M.G.D.); orfanakis3012m@gmail.com (M.O.); konax@outlook.com (K.A.); raliakolliniatis21@gmail.com (O.K.); iwanna\_lapi@hotmail.com (I.L.); renaderm@med.uoc.gr (E.D.); venihaki@med.uoc.gr (M.V.)

<sup>2</sup> Institute of Molecular Biology and Biotechnology, FORTH, 71100 Heraklion, Greece

<sup>3</sup> Department of Nutrition and Feed Technology, Nofima AS, 5141 Bergen, Norway; Tone.Aspevik@Nofima.no (T.A.); katerina.Kousoulaki@Nofima.no (K.K.)

<sup>4</sup> Laboratory of Pathology, School of Medicine, University of Crete, Heraklion 70013, Greece; tzardi@med.uoc.gr

\* Correspondence: tsatsani@uoc.gr, Tel.: +30-2810394833

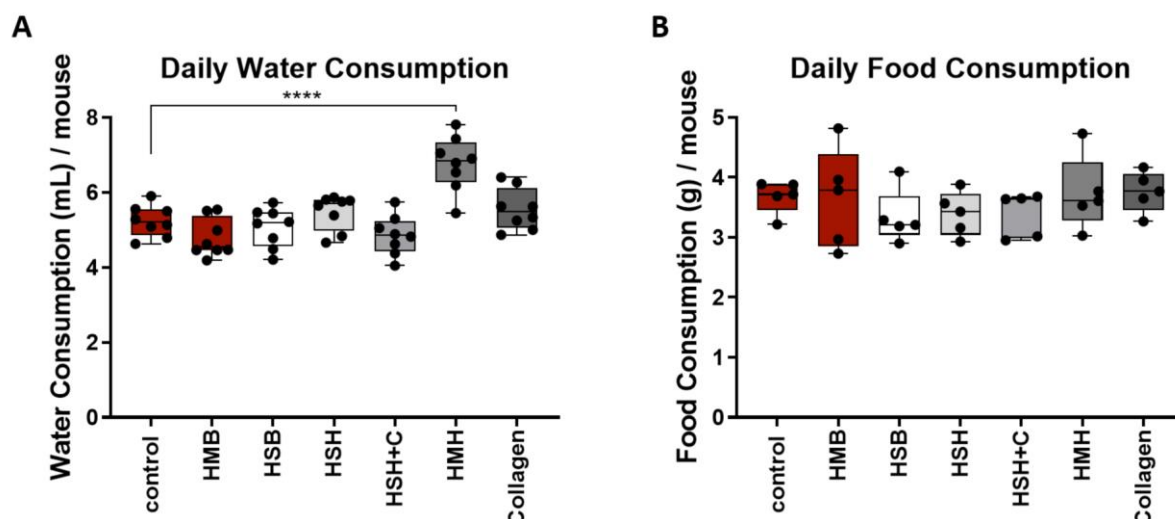

Figure S1. Daily A. water and B. food consumption of animals fed diets containing the different supplements. Graphs represent median  $\pm$  SD and 2-way ANOVA statistical analysis was performed. \*\*\*\* $p < 0.0001$ .

**Table S1.** Composition of the different fish sidestream-derived supplements used in the cutaneous model.

| Chemical composition               |                             | HMB   | HMH   | HSB   | HSH   | Collagen |
|------------------------------------|-----------------------------|-------|-------|-------|-------|----------|
| Crude protein Kjeldahl<br>(N*6.25) | %                           | 82.4  | 59.3  | 89.8  | 89.3  | >90      |
| Total dry matter                   | %                           | 96.3  | 96.4  | 96.3  | 98    | 96.7     |
| Ash                                | %                           | 15.7  | 38.3  | 9.3   | 12.6  | 3.1      |
| Watersoluble crude protein         | g/100g sample               | 82    | 58.5  | 88.7  | 89.2  | >95      |
| <b>Peptide size distribution</b>   |                             |       |       |       |       |          |
| Mw-peptide > 20000                 | % of water sol.<br>peptides | <0.1  | <0,.1 | <0,.1 | <0,.1 | <0,.1    |
| Mw-peptide 20000-15000             | % of water sol.<br>peptides | <0,.1 | <0,.1 | <0,.1 | <0,.1 | <0,.1    |
| Mw-peptide 15000-10000             | % of water sol.<br>peptides | 0.1   | 0.1   | 0.1   | 0.1   | 0.1      |
| Mw-peptide 10000-8000              | % of water sol.<br>peptides | 0.1   | 0.3   | 0.2   | 0.2   | 0.5      |
| Mw-peptide 8000-6000               | % of water sol.<br>peptides | 0.5   | 1     | 0.9   | 1     | 2.4      |
| Mw-peptide 6000-4000               | % of water sol.<br>peptides | 1.9   | 3.7   | 3.3   | 3.6   | 9.4      |
| Mw-peptide 4000-2000               | % of water sol.<br>peptides | 8.2   | 13.9  | 12.9  | 15.9  | 28.1     |
| Mw-peptide 2000-1000               | % of water sol.<br>peptides | 14.5  | 17.7  | 18.4  | 22.2  | 28       |
| Mw-peptide 1000-500                | % of water sol.<br>peptides | 17.7  | 16.6  | 18.9  | 19    | 17.6     |
| Mw-peptide 500-200                 | % of water sol.<br>peptides | 19.7  | 16.9  | 20.3  | 17.3  | 9.3      |
| Mw-peptide 200-                    | % of water sol.<br>peptides | 37.3  | 29.7  | 24.9  | 20.7  | 4.6      |
| <b>Total amino acids</b>           |                             |       |       |       |       |          |
| Aspartic acid                      | g/100g sample               | 6.5   | 4.4   | 7     | 6.8   | 6.4      |

|                           |                |      |      |      |      |      |
|---------------------------|----------------|------|------|------|------|------|
| Glutamic acid             | g/100g sample  | 10.7 | 7.4  | 10.9 | 10.8 | 10   |
| Hydroksyproline           | g/100g sample  | 1.4  | 1.9  | 3    | 4.1  | 9.8  |
| Serine                    | g/100g sample  | 3.1  | 2.5  | 3.4  | 3.8  | 6.1  |
| Glycine                   | g/100g sample  | 5.3  | 6.2  | 8.8  | 12.1 | 26   |
| Histidine                 | g/100g sample  | 5    | 1.8  | 1.8  | 1.7  | 1.1  |
| Arginine                  | g/100g sample  | 4.5  | 3.7  | 5.3  | 5.6  | 8.9  |
| Threonine                 | g/100g sample  | 2.9  | 2    | 3.2  | 2.9  | 2.8  |
| Alanine                   | g/100g sample  | 4.6  | 4.2  | 5.6  | 6    | 9.8  |
| Proline                   | g/100g sample  | 3    | 3.1  | 4.5  | 6.1  | 11.7 |
| Tyrosine                  | g/100g sample  | 1.7  | 1.1  | 1.7  | 1.4  | 0.37 |
| Valine                    | g/100g sample  | 3.1  | 2    | 3.2  | 2.8  | 1.9  |
| Methionine                | g/100g sample  | 1.9  | 1.4  | 2.3  | 2.4  | 2.4  |
| Isoleucine                | g/100g sample  | 2.4  | 1.5  | 2.6  | 2.1  | 1.1  |
| Leucine                   | g/100g sample  | 5    | 3.2  | 5    | 4.3  | 2.4  |
| Phenylalanine             | g/100g sample  | 1.9  | 1.5  | 2.3  | 2.3  | 2.1  |
| Lysine                    | g/100g sample  | 6.9  | 4.3  | 6.5  | 5.5  | 3.7  |
| <b>Quality parameters</b> |                |      |      |      |      |      |
| Putrescine                | mg/kg          | 63   | 44   | 110  | 180  | 41   |
| Cadaverine                | mg/kg          | <20  | <20  | <20  | <20  | <20  |
| Histamine                 | mg/kg          | 74   | 38   | 67   | 68   | 23   |
| Trimethylamin-N           | mg N/100 gram  | 17   | 15   | 14   | <1   | 66   |
| Trimethylaminoxide-N      | mg N/100 gram  | 162  | 53   | 125  | <1   | 5    |
| <b>Free amino acids</b>   |                |      |      |      |      |      |
| Aspartic acid             | g/100 g sample | 0.06 | 0.07 | 0.09 | 0.1  | 0    |
| Glutamic acid             | g/100 g sample | 0.39 | 0.27 | 0.36 | 0.32 | 0.01 |
| Hydroksyproline           | g/100 g sample | 0.01 | 0.01 | 0.02 | 0.03 | 0    |
| Serine                    | g/100 g sample | 0.09 | 0.12 | 0.12 | 0.16 | 0.02 |

---

|                      |                |      |      |      |      |      |
|----------------------|----------------|------|------|------|------|------|
| Asparagine           | g/100 g sample | 0.02 | 0.01 | 0.02 | 0.02 | 0.01 |
| Glycine              | g/100 g sample | 0.15 | 0.21 | 0.15 | 0.21 | 0.05 |
| Glutamine            | g/100 g sample | 0.21 | 0.43 | 0.43 | 0.45 | 0    |
| Histidine            | g/100 g sample | 3.2  | 0.81 | 0.22 | 0.2  | 0    |
| Threonine            | g/100 g sample | 0.1  | 0.1  | 0.14 | 0.14 | 0    |
| Alanine              | g/100 g sample | 0.29 | 0.27 | 0.44 | 0.4  | 0.03 |
| Arginine             | g/100 g sample | 0.25 | 0.34 | 0.19 | 0.21 | 0.02 |
| Proline              | g/100 g sample | 0.06 | 0.09 | 0.1  | 0.07 | 0    |
| Tyrosine             | g/100 g sample | 0.18 | 0.26 | 0.18 | 0.14 | 0.02 |
| Valine               | g/100 g sample | 0.1  | 0.14 | 0.23 | 0.19 | 0.01 |
| Methionine           | g/100 g sample | 0.29 | 0.36 | 0.47 | 0.37 | 0    |
| Cysteine             | g/100 g sample | 0    | 0    | 0    | 0    | 0    |
| Isoleucine           | g/100 g sample | 0.08 | 0.13 | 0.24 | 0.19 | 0.01 |
| Leucine              | g/100 g sample | 0.42 | 0.78 | 0.83 | 0.72 | 0.04 |
| Phenylalanine        | g/100 g sample | 0.3  | 0.43 | 0.48 | 0.67 | 0.07 |
| Tryptophane          | g/100 g sample | 0.07 | 0.07 | 0.12 | 0.1  | 0    |
| Lysine               | g/100 g sample | 0.56 | 0.39 | 0.4  | 0.3  | 0    |
|                      |                |      |      |      |      |      |
| Creatinine           | g/100 g sample | 0.94 | 0.15 | 0.4  | 0.34 | 0.07 |
| β-alanine            | g/100 g sample | 0    | 0    | 0.14 | 0.21 | 0    |
| Taurine              | g/100 g sample | 0.85 | 1.4  | 0.46 | 1.3  | 0.03 |
| 4-aminobutanoic acid | g/100 g sample | 0    | 0    | 0    | 0.01 | 0    |
| Citrulline           | g/100 g sample | 0    | 0    | 0    | 0.01 | 0    |
| Carnosine            | g/100 g sample | 0.06 | 0.03 | 0.08 | 0.03 | 0.01 |
| Anserine             | g/100 g sample | 0.11 | 0.05 | 2.3  | 0.64 | 0    |
| L-Ornithine          | g/100 g sample | 0.02 | 0.02 | 0.02 | 0.02 | 0    |

Table S2. List of oligonucleotides used in real time PCR reactions.

| Primer             | Sequence                  |
|--------------------|---------------------------|
| Actin-Fwd          | CATTGCTGACAGGATGCAGAAGG   |
| Actin-Rev          | TGCTGGAAGGTGGACAGTGAGG    |
| TNF $\alpha$ -Fwd  | GCCACGTCGTAGCAAACCACC     |
| TNF $\alpha$ -Rev  | CGGGGCAGCCTTGTCCCTTG      |
| IL-6-Fwd           | CAAAGCCAGAGTCCTTCAGAG     |
| IL-6-Rev           | CACTCCTTCTGTGACTCCAGC     |
| IL-1 $\beta$ -Fwd  | CGGACCCCAAAAGATGAAGGGCTG  |
| IL-1 $\beta$ - Rev | GCTCTTGTTGATGTGCTGCTGCGAG |
| Cxcl1- Fwd         | CCCAAACCGAAGTCATAGCCA     |
| Cxcl1- Rev         | CTCCGTTACTTGGGGACACC      |
| Cxcl2-Fwd          | CGCCCAGACAGAAGTCATAGCCAC  |
| Cxcl2-Rev          | CGTTGAGGGACAGCAGCCCAG     |
| Ccl2-Fwd           | GGCTGGAGCATCCACGTGTTGG    |
| Ccl2-Rev           | TTGGGGTCAGCACAGACCTCTCTC  |
| Ccl3-Fwd           | GAAGGATACAAGCAGCAGCG      |
| Ccl3-Rev           | TTCTCTTAGTCAGGAAAATGACACC |
| IL-10 Fwd          | GCGCTGTCATCGATTTCTCCCCTG  |
| IL-10-Rev          | GGCCTTGTAACACCTTGGTCTTGG  |
| TGF-b-Fwd          | GACACACAGTACAGCAAGGTCC    |
| TGF-b-Rev          | CGACCCACGTAGTAGACGATG     |
